# Supplementary material
Source: publisher site journal article supplement (https://www.dovepress.com/article/341905)
Supplement: Supplementary file 1 [file get_supplementary_file.php]

**Appendix 1.** DETAILED RESULTS FROM THE CONTENT ANALYSIS OF COMPAS+ WORKSHOP REPORTS, ACTION PLANS AND FACILITATORS FIELD NOTES FROM THE 14 STUDY SITES.

| Key COPD quality problem 1: Lack of organisation/coordination of COPD services | |
| --- | --- |
| **Causes (CFIR)** | **Strategies/Solutions** **(Behavior Change Wheel)** |
| Planning - Interorganizational coordination   - Lack of coordination of services during transitions of care - Lack of referral to smoking cessation support services   Planning - Intraorganizational coordination   - Lack of a case manager/case management - Lack of definition of professional roles   Intervention - Design quality and packaging of the intervention   - Lack of continuum of care planning and COPD services - Lack of local guidelines   Inner setting - Access to knowledge and information   - Lack of professional education on COPD prevention, diagnosis and management - Lack of access to common tools and materials   Inner setting - Leadership engagement   - Lack of leadership in the management of COPD in primary care - Lack of physician engagement   Inner setting - Available resources   - Lack of financial resources - Lack of human resources | **Education**   - Educate professionals to improve their knowledge of:   - Chronic disease COPD   - Service delivery   - Roles and responsibilities of each professional   **Enablement**   - Document/Define/Agree/Update the care pathway   - Create a working committee     - Identify stakeholders     - Involve users   - Describe current services   - Evaluate resources and practices in relation to the guidelines   - Revise and define professional roles and responsibilities   - Identify and define relevant indicators - Monitor the pathway (e.g. monitor a list of indicators from the EMR) - List and adapt COPD tools   - Identify available COPD tools   - Update the harmonized reference form   - Select algorithms for the diagnosis and treatment of COPD   - Create decision trees to facilitate the user's path through the continuum of care and services   - Create and establish a collective order for the COPD action plan - Improve the service offer   - Facilitate the vaccination process   - Ensure access to the smoking cessation and pulmonary rehabilitation program on an ongoing basis   **Environmental restructuring**   - Make human, material and financial resources available at appropriate points in the continuum of care and services   - Lack of resources for CQI   - Lack of resources for respiratory therapy   - Lack of space for professionals/treatments   - Lack of funding for professional recruitment |

| Key COPD quality problem 2: Lack of screening services coordination | |
| --- | --- |
| **Causes (CFIR)** | **Strategies/Solutions (Behavior Change Wheel)** |
| - Planning – Interorganizational coordination   - Lack of a systematic screening process in the emergency department and during hospitalization - Planning – Intraorganizational coordination   - Lack of systematic screening process for COPD and identification of at-risk clients   - Timing for spirometry tests - Intervention - Relative advantage of the intervention   - Lack of focus on COPD as a primary care condition   - Lack of awareness of COPD among professionals - Inner setting - Available resources   - Difficult access to screening due to physical distance   - Lack of spirometers   - Lack of respiratory therapists - Outer setting – Patient needs & resources   - Users’ denial of their condition   - Refusal to take the test due to fear of the diagnosis - Inner setting - Access to knowledge and information   - Lack of knowledge of signs and symptoms   - Lack of awareness of the importance of spirometry | **Environmental restructuring**   - Implement a screening system - Improve the service offer   - Make spirometry available and easily accessible in primary care   - Implement systematic and repeated screening of at-risk patients at all entry points (e.g., emergency rooms, FMGs, etc.)   - Establish performance objectives to reach optimal screening targets and ensure follow-up   **Education**   - Improve knowledge of COPD among professionals, patients and the general population to improve screening   **Enablement**   - Use an algorithm to identify at-risk clients - Use a self-administered screening questionnaire |

| Key COPD quality problem 3: Lack of interprofessional communication and collaboration | |
| --- | --- |
| **Causes (CFIR)** | **Strategies/Solutions (Behavior Change Wheel)** |
| Inner setting - Intraorganizational communication   - Lack of awareness of professional roles - Lack of communication tools in the EMR - Different physical locations of professionals - Lack of inclusion of the patient and his/her family in the interprofessional team   Inner setting - Interorganizational communication   - Lack of knowledge about smoking cessation support services - Lack of dissemination of information on the organization of services - Lack of a communication system linking the entire continuum of care and services | **Environmental restructuring**   - Implement an interdisciplinary and partnership approach to care and services with users and their families   - Create an interdisciplinary team in chronic illness   - Plan/organize meetings between professionals (pharmacists, etc.), including the patient, for consultation or information sharing   - Involve the community pharmacist in the follow-up of COPD action plans   **Enablement**   - Create/implement collective orders - Create and update a patient logbook and promote engagement of COPD patients - Create/implement COPD action plan for all patients - Create/implement communication tools in the EMR   **Persuasion**   - Organize and promote interprofessional education and training - Disseminate information on professional roles - Disseminate available tools and educational material to the community and stakeholders - Disseminate/promote the use of the clinical pathway |

| Key COPD quality problem 4: Lack of treatment adherence | |
| --- | --- |
| **Causes (CFIR)** | **Strategies/Solutions (Behavior Change Wheel)** |
| Intervention - Design quality of the intervention versus patient needs   - Complexity of pharmaceutical treatment - Education not adapted to patient needs - Cost of treatment   Planning – Intraorganizational coordination   - Difficulty in accessing the patient’s COPD action plan - Lack of follow-up and support by professionals - Lack of collaboration with the patient and his/her relatives   Inner setting - Available resources   - Difficult access or lack of knowledge of services/resources and tools to engage patients in self-management   Outer setting – Patient needs and resources   - Low educational/health literacy levels - Material deprivation - Difficulty in changing habits - Denial of their condition - Lack of knowledge of COPD   - Lack of knowledge of various professionals’ roles | **Enablement**   - Enhance user education program   - Identify/recommend teaching tools   - Adapt individual and group patient education interventions recommended in the literature (e.g. motivational interviewing)   - Adapt patient education for those who have a low level of education/health literacy   - Develop a questionnaire to identify patients' educational needs and personalize the intervention   - Involve patients, caregivers and family members in COPD education interventions - Use follow-up tools that promote partnership and collaboration   - Create, update and promote the use of a self-management logbook for patient with COPD   - Define the algorithm for the development and renewal of COPD action plan in collaboration with patients     - Improve the "action plan" booklet     - Engage patients in the development of their action plan     - Use clinical reminders in the EMR to note if the action plan is completed or needs to be reviewed     - Engage community pharmacists in the implementation of the action plan   **Education/Persuasion**   - Promote COPD services, educational programs and tools to patients |
